# Supplementary figures and images for: Sex-Related Pain Behavioral Differences following Unilateral NGF Injections in a Rat Model of Low Back Pain
Source: MDPI journal article supplement (doi:10.3390/biology11060924), 2022-06-16

Suppl. Figure 2.

A.

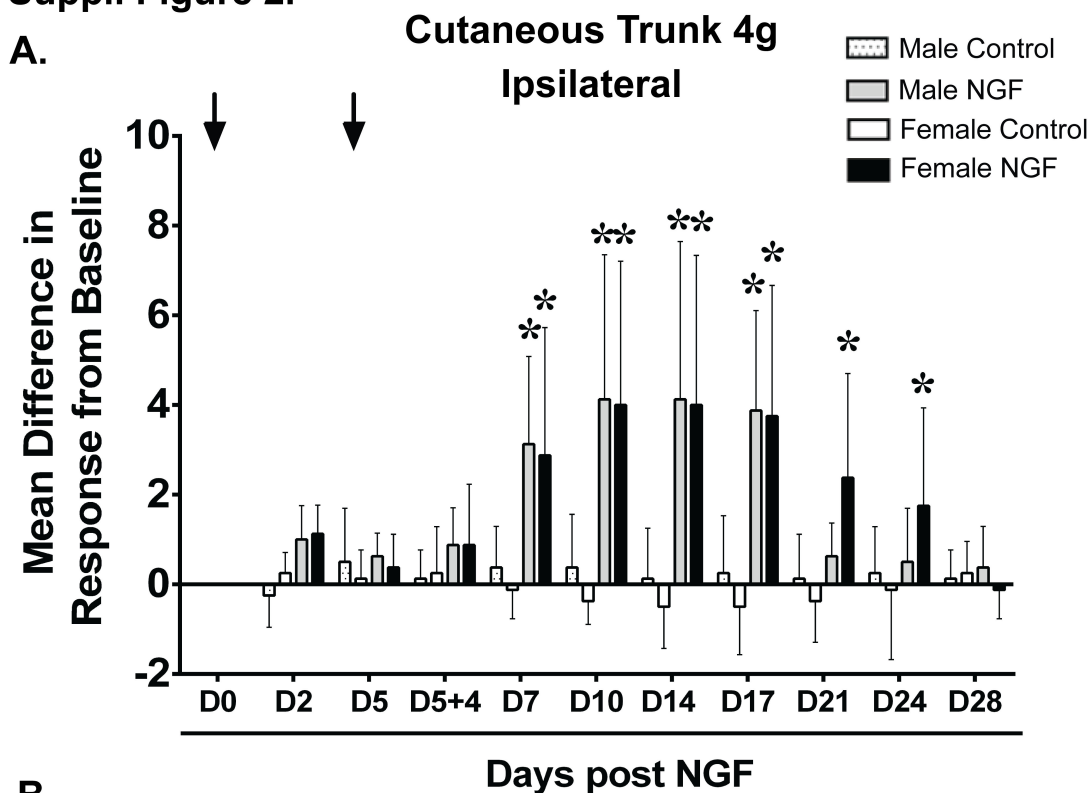

B.

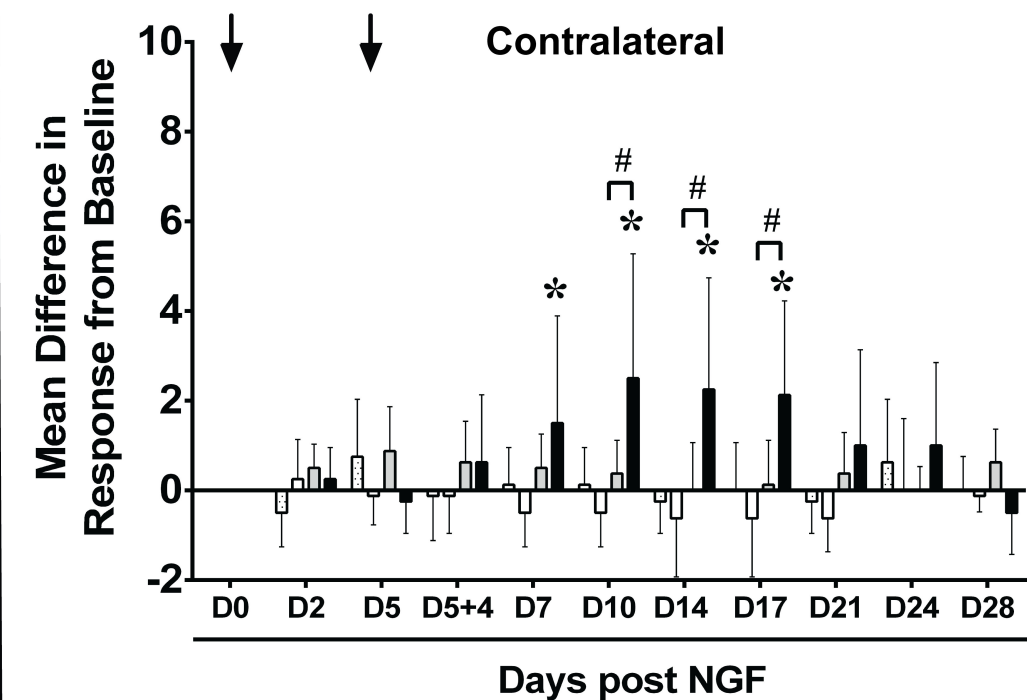

Supplement: s1 [file s1]

Suppl. Figure 1.

Cutaneous Trunk 1g

A.

Ipsilateral

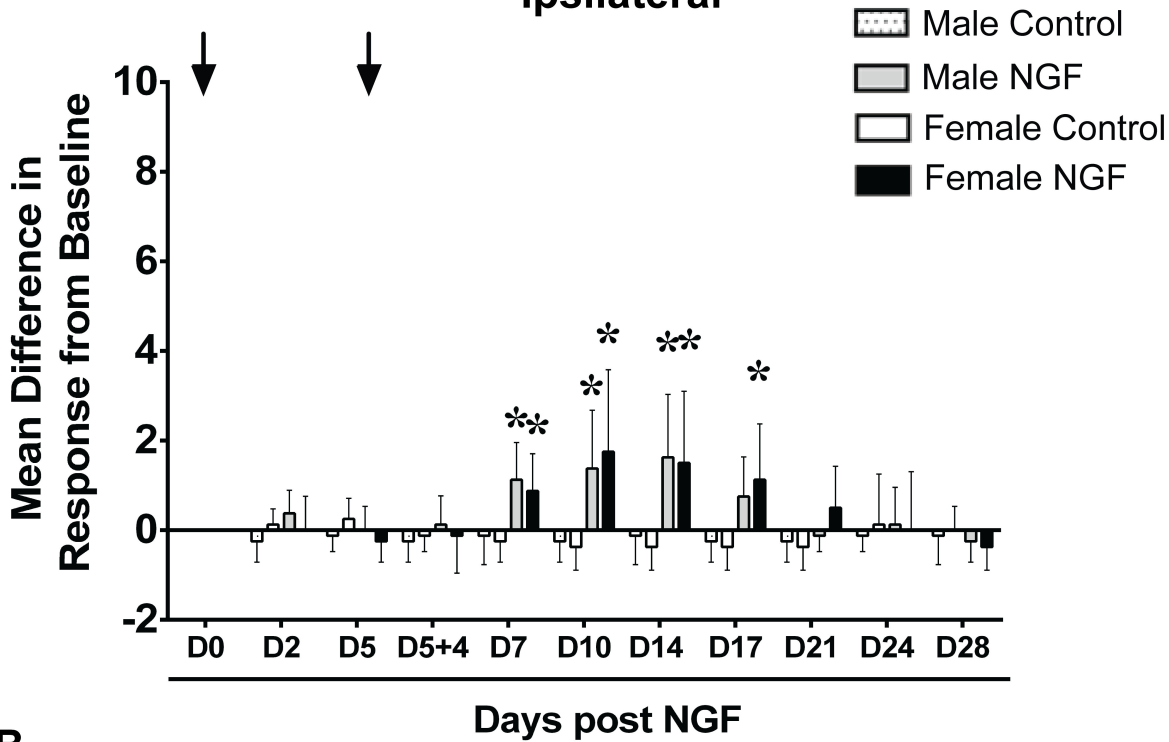

B.

Contralateral

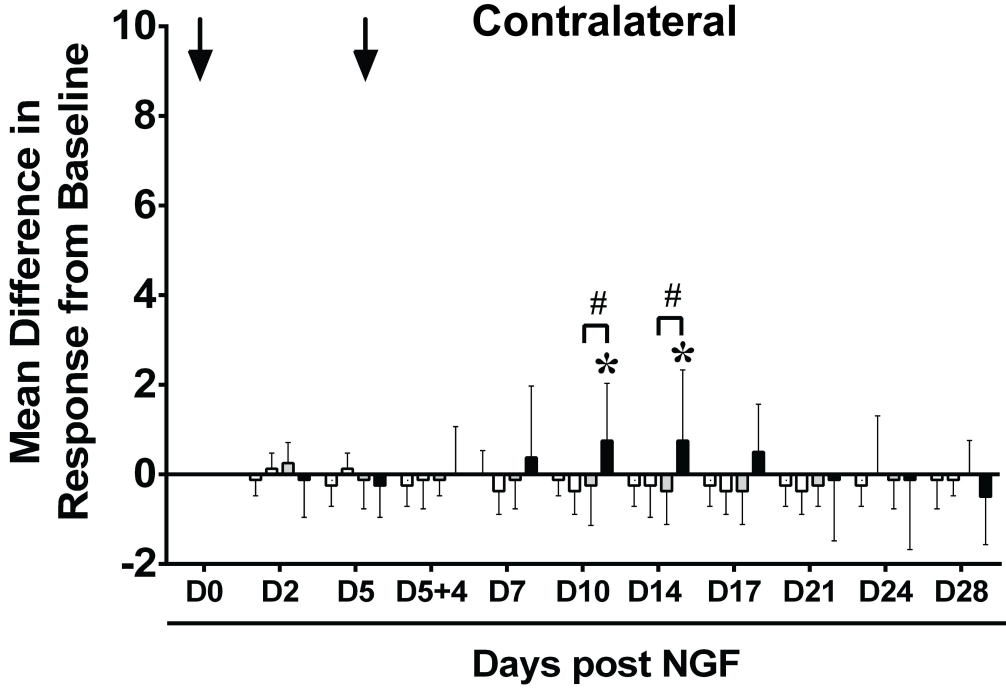

Supplement: s1 [file s1]
